# Supplementary material for: Improved multivariate analysis for fast and selective monitoring of structural dynamics by in situ X-ray powder diffraction
Source: Royal Society of Chemistry journal article supplement (doi:10.1039/c7cp06326a), 2017-10-26
Supplement: c7cp06326a1.zip [file c7cp06326a1.zip]

## **SUPPORTING INFORMATION**

### **Improved multivariate analysis for fast and selective monitoring of structural dynamics by in situ x-ray powder diffraction.**

Pietro Guccione<sup>a</sup>, Luca Palin<sup>b</sup>, Marco Milanese<sup>b</sup>, Benny Danilo Belviso<sup>c</sup>,  
Rocco Caliandro<sup>c\*</sup>

<sup>a</sup>Dipartimento di Ingegneria Elettrica e dell'Informazione, Politecnico di Bari, via Orabona 4, Bari, 70125, Italy.

<sup>b</sup>Dipartimento di Scienze e Innovazione Tecnologica, Università del Piemonte Orientale, viale T. Michel 11, Alessandria, 15121, Italy.

<sup>c</sup>Institute of Crystallography, CNR, via Amendola, 122/o, Bari, 70126, Italy.

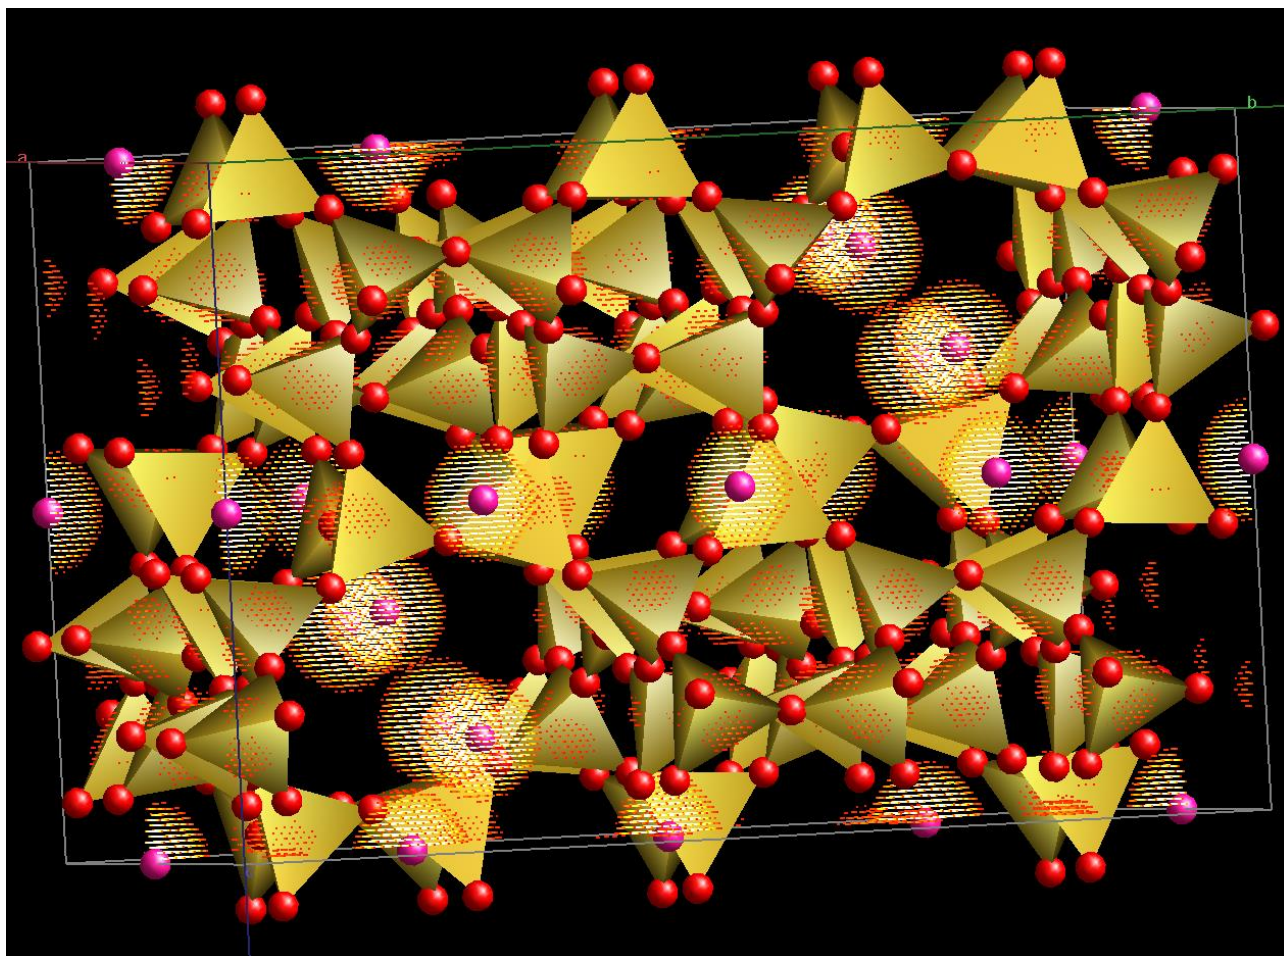

Figure S11     Fourier difference electron density map calculated for the low-T pattern, by using a model with 4 Xe atoms (ref 1). Not clear extra density is seen.

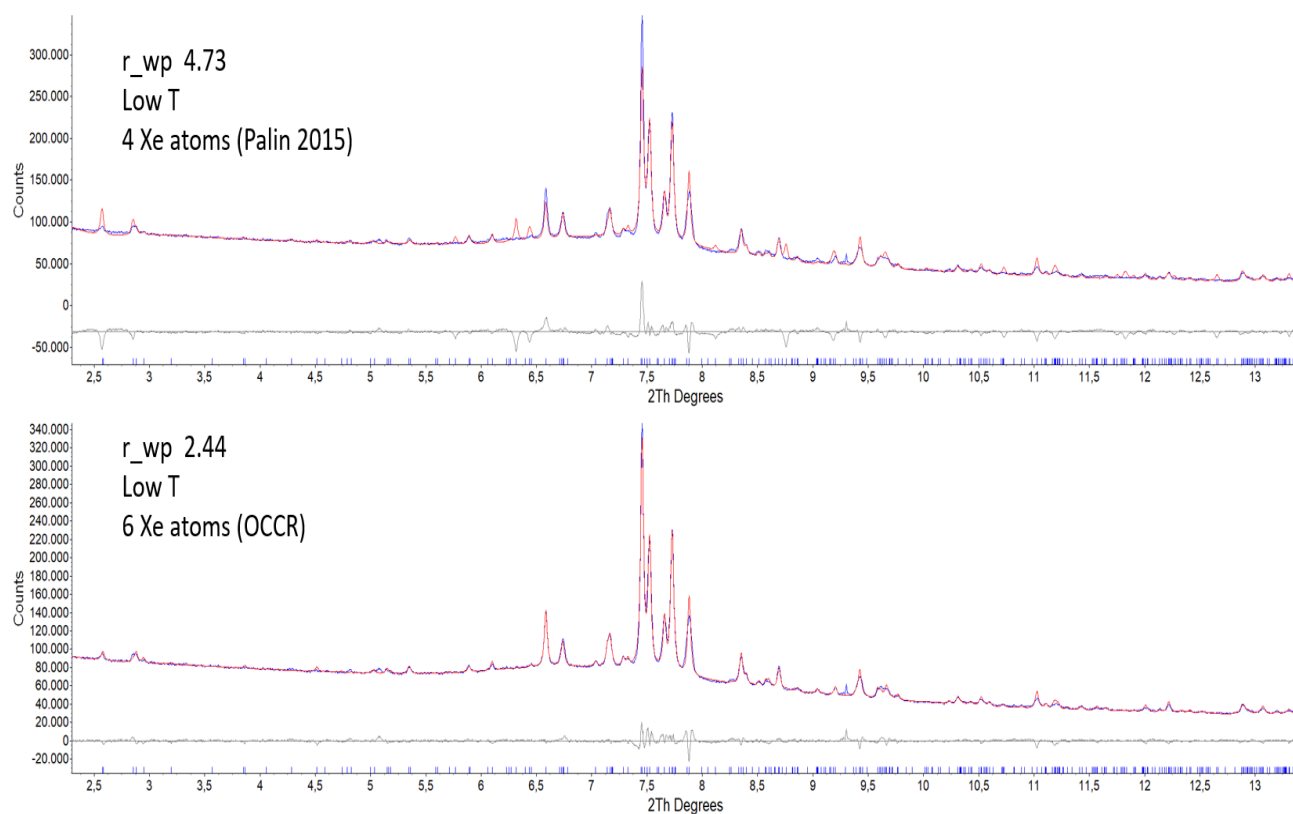

Figure SI2 Results of Rietveld refinement of the low T static pattern with the structural model composed by 4 Xe atoms derived by previous analysis (ref 1) (top) and by 6 Xe atoms derived by the present peak alignment+OCCR analysis (bottom).

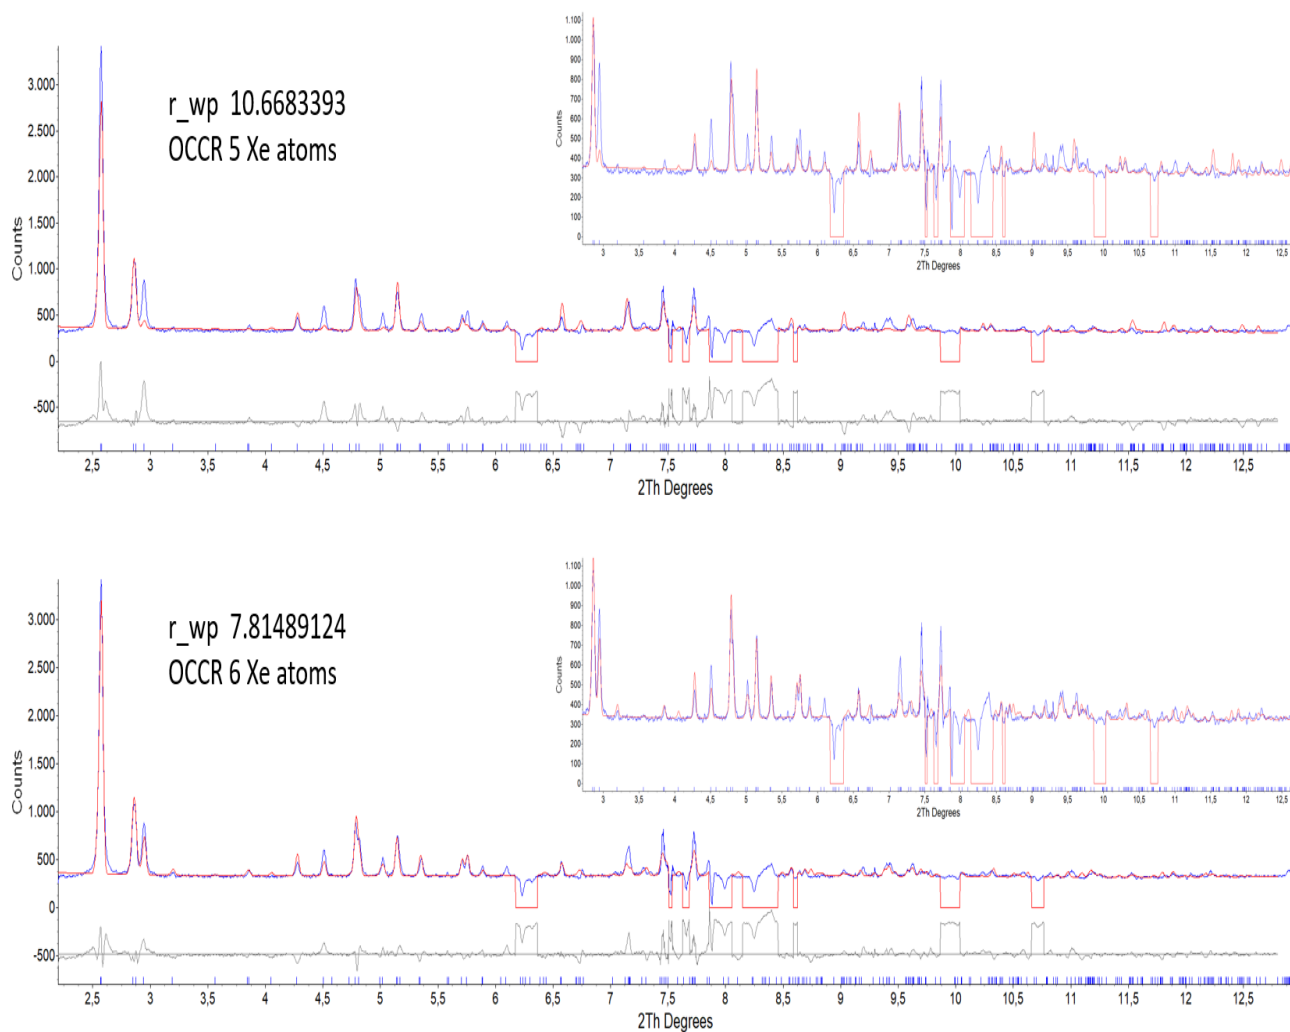

Figure SI3 Results of Rietveld refinement of the pattern obtained by the peak alignment+OCCR procedure with the structural model composed by 5 (top) or 6 (bottom) Xe atoms. Regions with intensities under the background are excluded from the analysis.
